# Supplementary material
Source: PubMed Central journal article supplement (PMC5535042)

**NLRC3 protein inhibits inflammation by disrupting NALP3 inflammasome assembly via competition with the adaptor protein ASC for pro-caspase-1 binding**

**Supplementary Fig. 1. NLRC3 inhibits the NALP3 inflammasome. A.** IL-1 $\beta$  secretion in mouse immortalized bone marrow-derived macrophages transduced with shmNLRC3 plasmid in response to ATP treatment. **B.** IL-1 $\beta$  cleavage in cell lysates of shNLRC3 and shcontrol (shcont) THP-1 cell lines in response to two independent ATP treatments (ATP1 and ATP2).

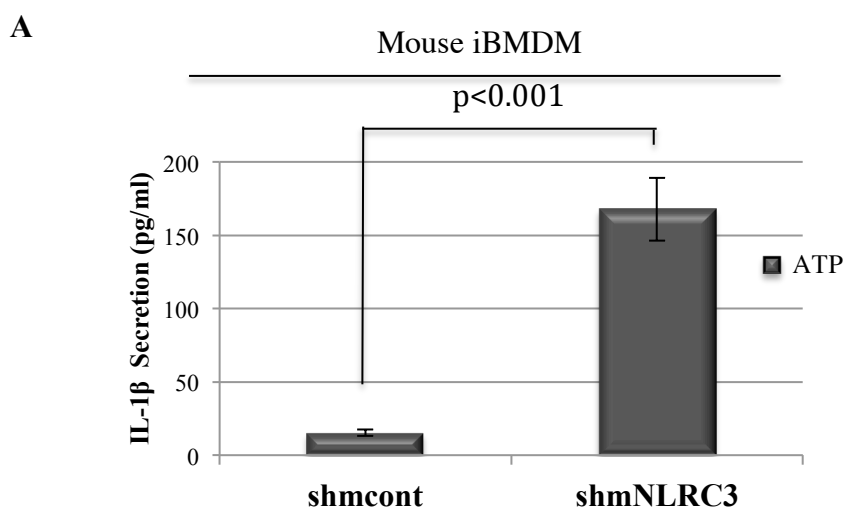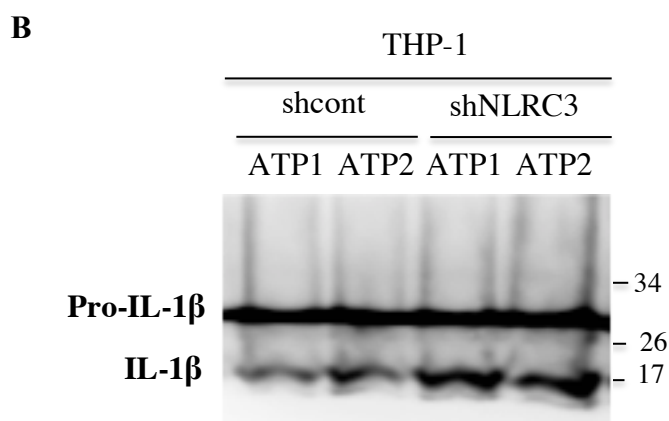

**Supplementary Fig. 2.** NLRC3 inhibits cell death in mouse immortalized bone marrow macrophages (iBMDM) in response to ATP and Nigericin treatments. LDH assay was performed. The representative result of five sets of independent experiment is shown.

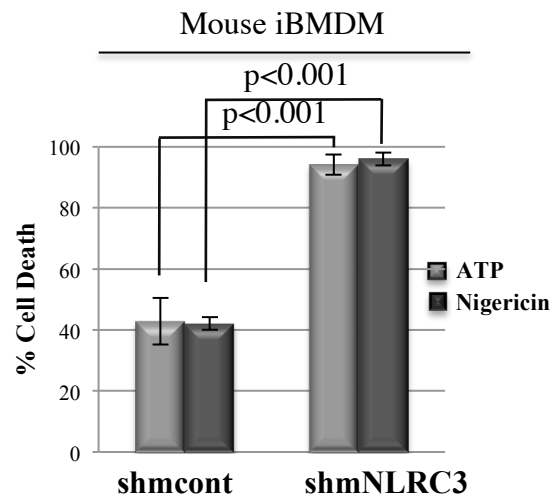

Supplement: 10.1074_M116.769695_jbc.M116.769695-1.pdf [file 10.1074_M116.769695_jbc.M116.769695-1.pdf]
